# Supplementary material for: Stress granules plug and stabilize damaged endolysosomal membranes
Source: PubMed Central journal article supplement (PMC10686833; doi:10.1038/s41586-023-06726-w), 2023-11-15

## Blots related to Figure 4b

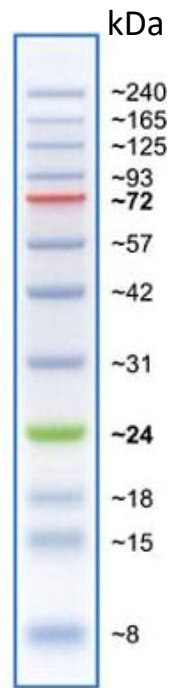

Prestained Protein Ladder – Broad molecular weight (10-245 kDa) (ab116028)

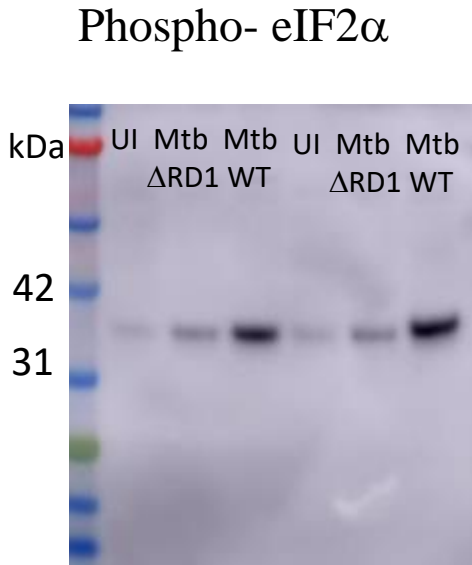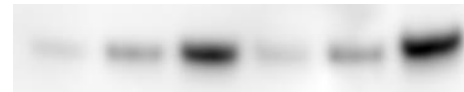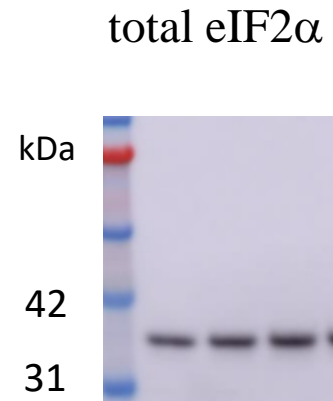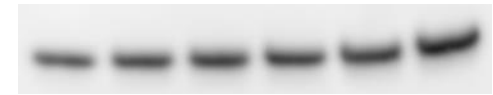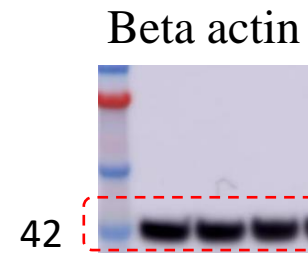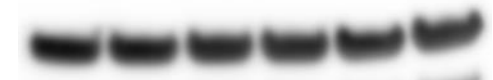

Blots related to Extended Data 2c

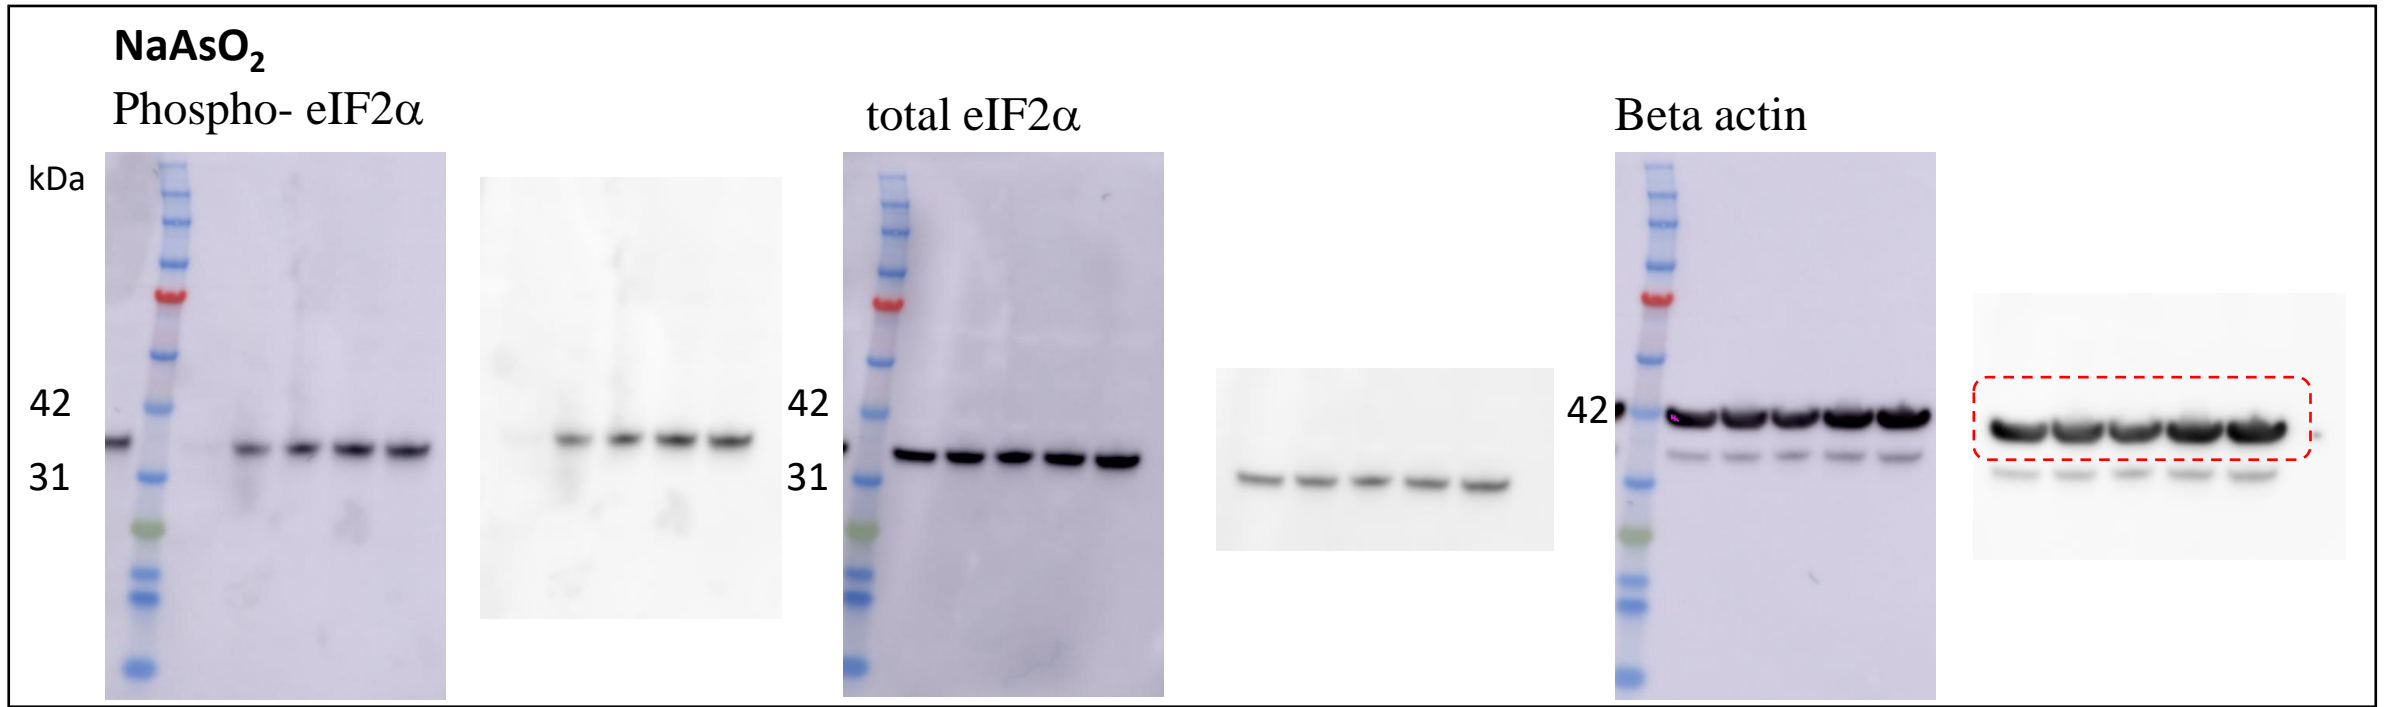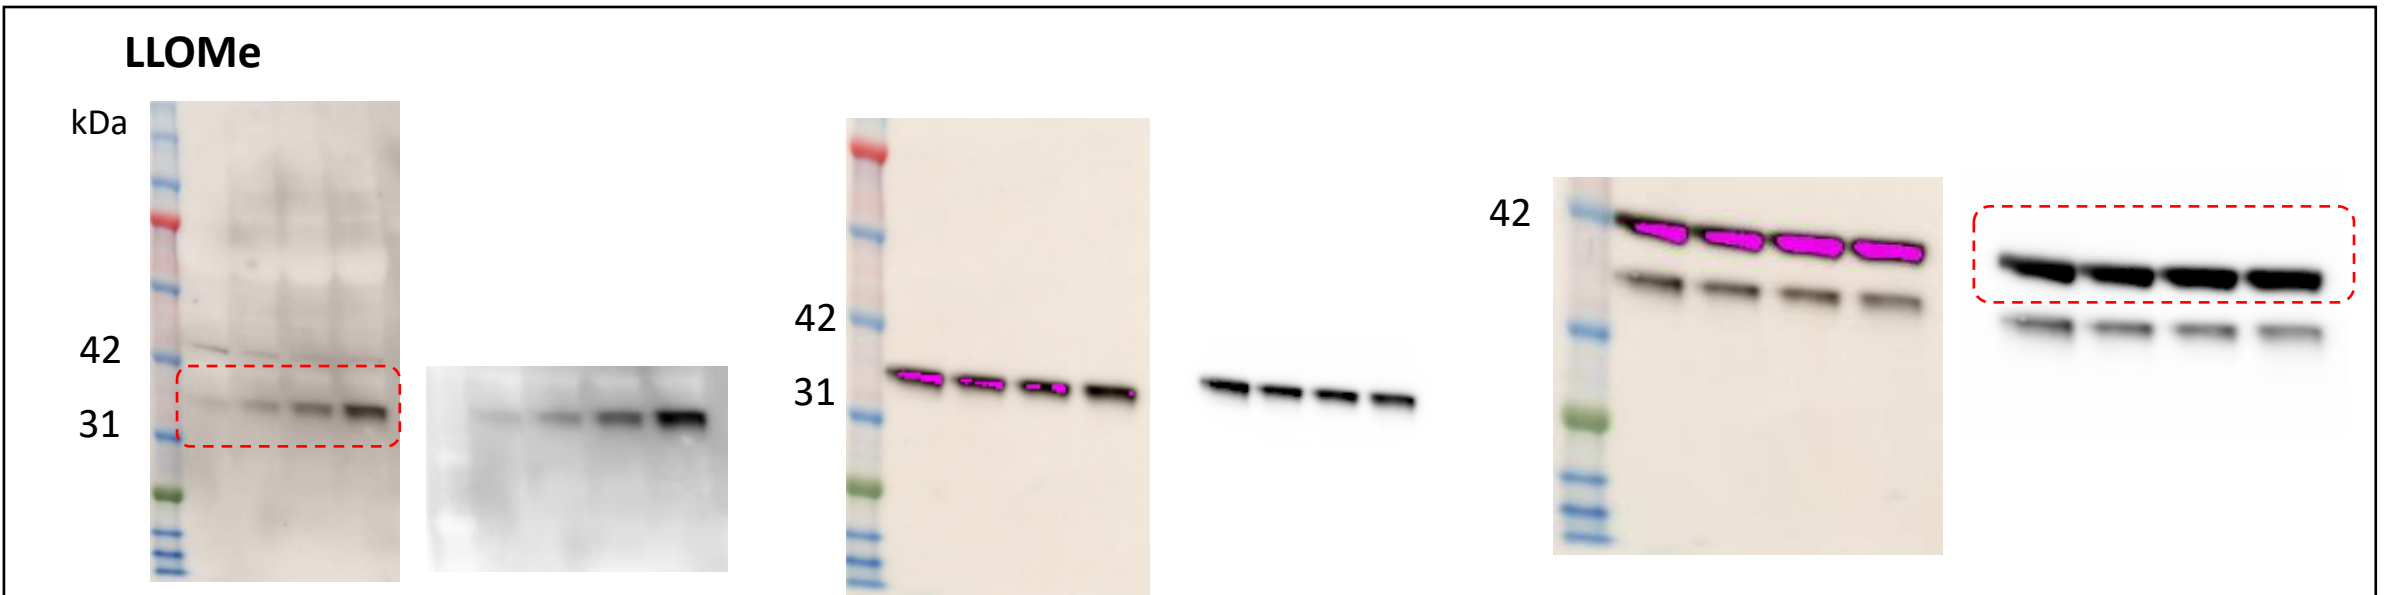

# Blots related to Extended Data 6b,h,i

## Extended Data 6b (iPSDM)

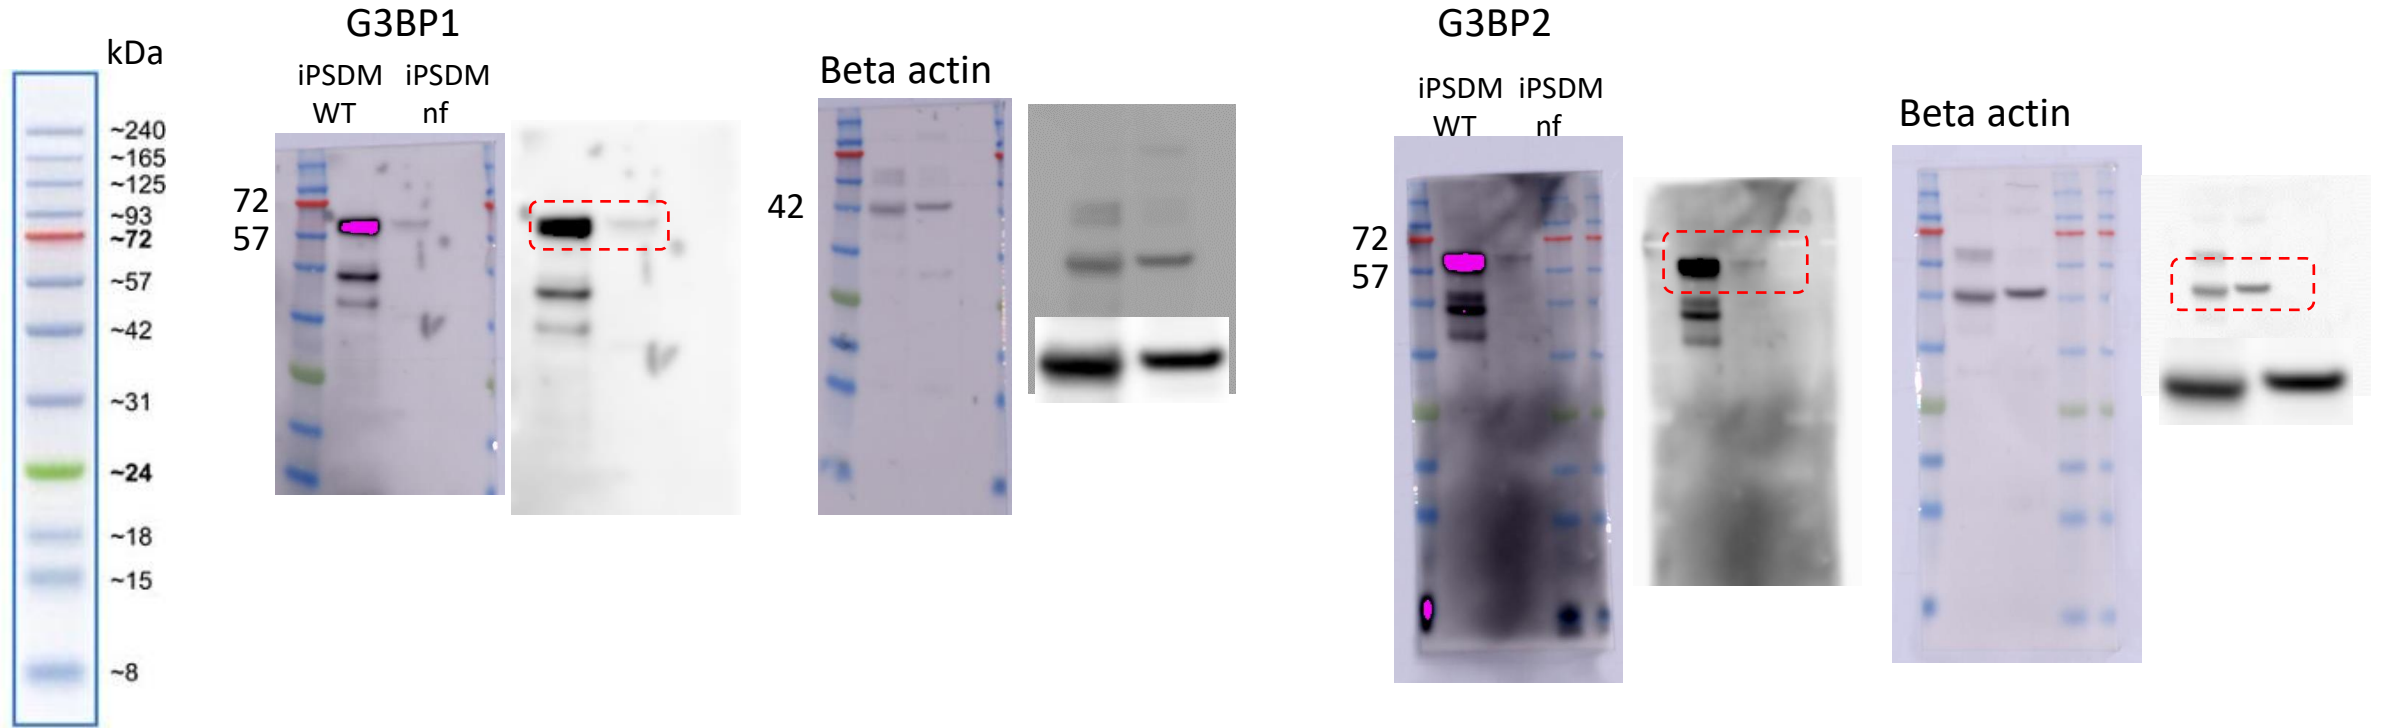

Prestained Protein  
Ladder – Broad  
molecular weight  
(10-245 kDa)  
(ab116028)

Extended Data 6h  
(HeLa cells)

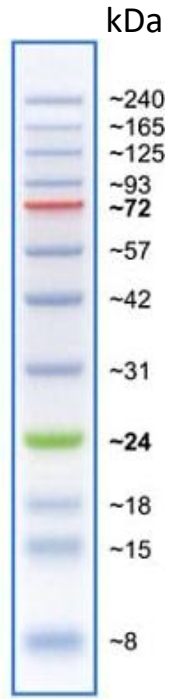

Prestained Protein Ladder – Broad molecular weight (10-245 kDa) (ab116028)

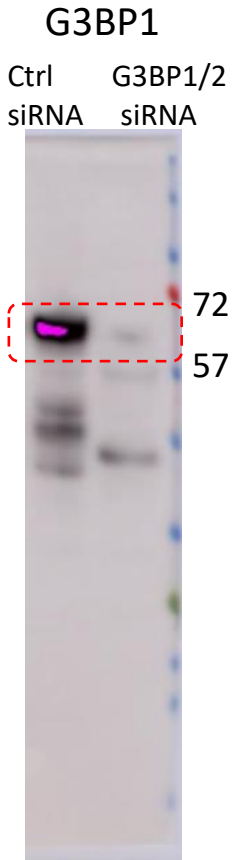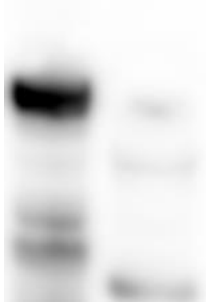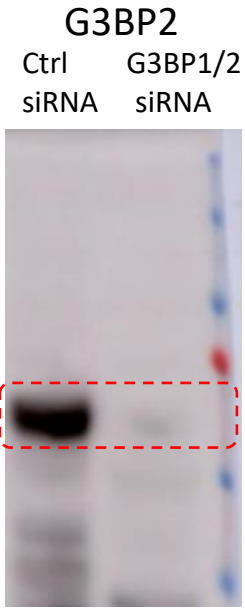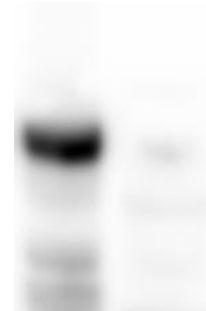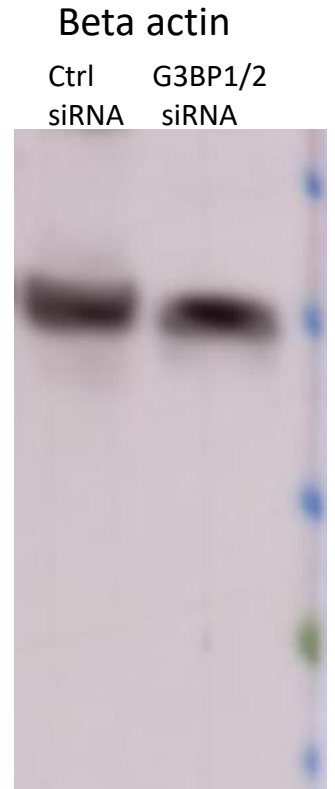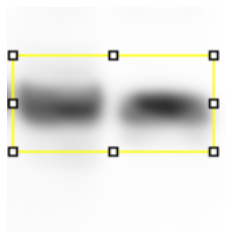

(same gel as G3BP1 and G3BP2)

## Extended Data 6i (hMDM)

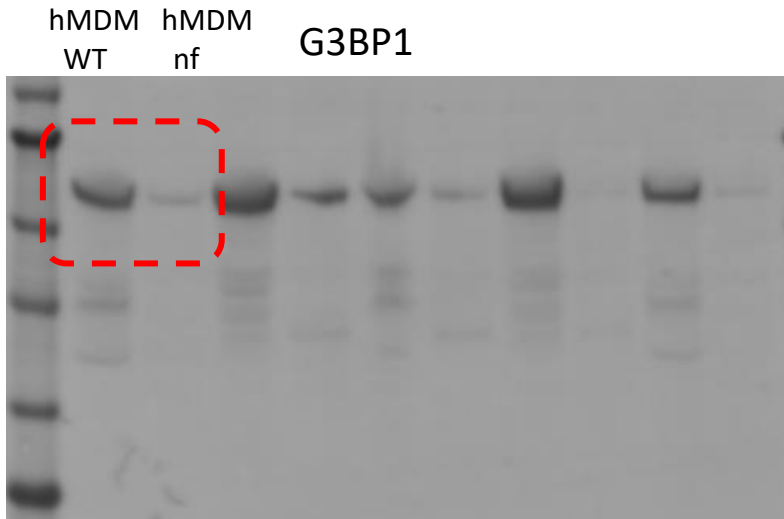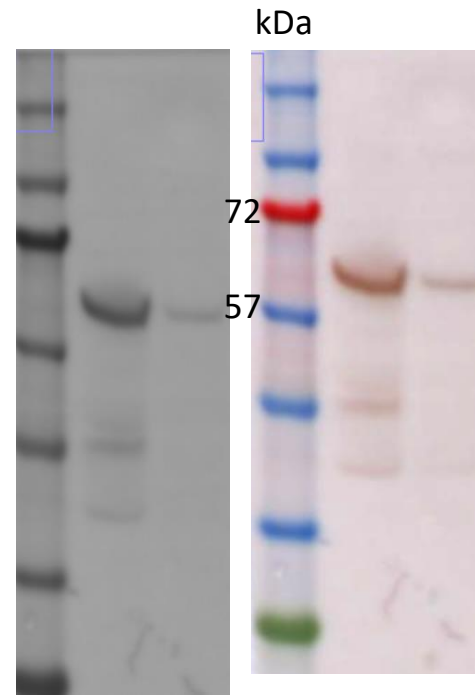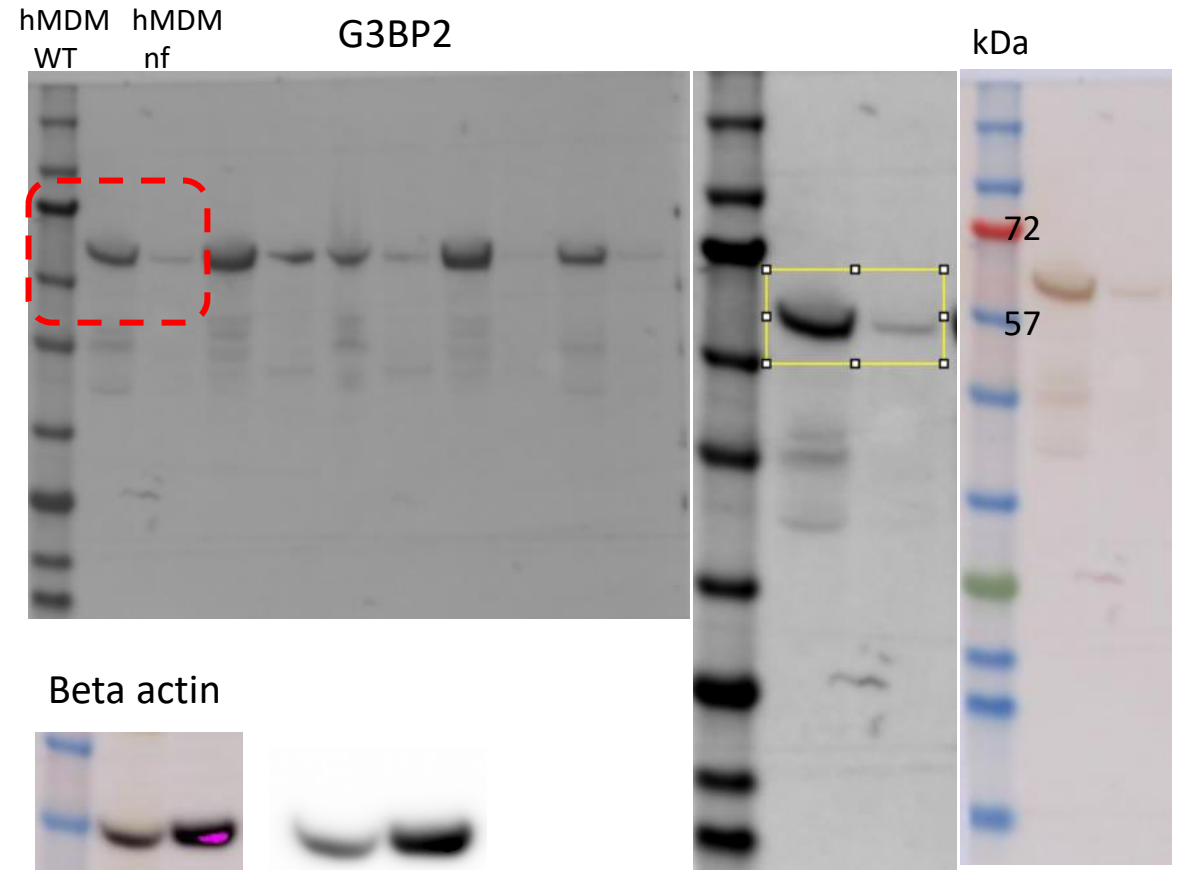

The selected red areas are shown in Extended Data 6i. The gel also shows other replicates achieving similar results (1<sup>st</sup> line WT, 2<sup>nd</sup> line nucleofected cells).

(same gel as G3BP1 and G3BP2)

# Blots related to Extended Data 7c

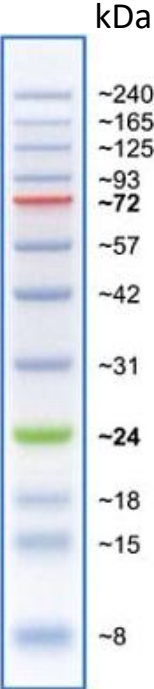

Prestained Protein Ladder – Broad molecular weight (10-245 kDa) (ab116028)

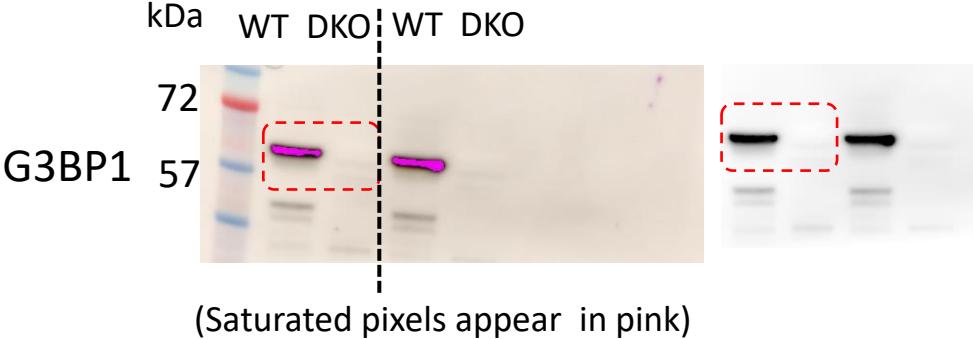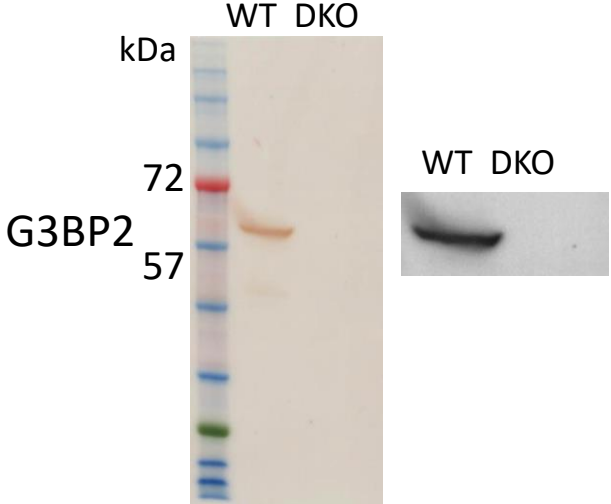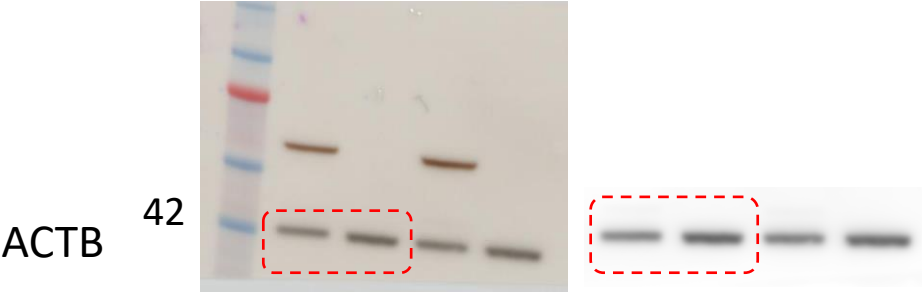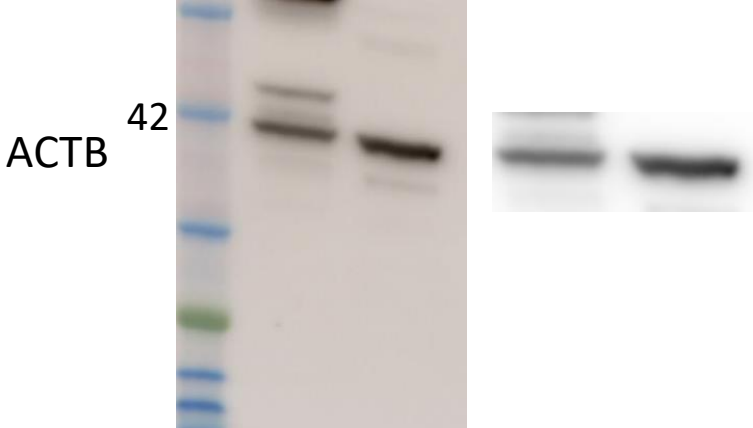

Supplement: 41586_2023_6726_MOESM3_ESM.pdf [file 41586_2023_6726_MOESM3_ESM.pdf]
